# Supplementary material
Source: PubMed Central journal article supplement (PMC11687590)
Supplement: media-1.pdf [file media-1.pdf]

1 **SUPPLEMENTAL MATERIALS**

2 **FOR**

3 **Immune Signatures of SARS-CoV-2 Infection Resolution in Human Lung Tissues**

4  
5 **CONTENT:**

6 **1. Supplemental Materials and Methods**

7 **2. Supplemental Figures (6 Figures)**

8 **Figure S1.** BLT-L mice are susceptible to SARS-CoV-2 infection.

9 **Figure S2.** SARS-CoV-2 undergoes viral adaptation within fLX.

10 **Figure S3.** Single-cell RNA sequencing analysis of fLX upon SARS-CoV-2 infection.

11 **Figure S4.** Gene signature of macrophage-like T cells.

12 **Figure S5.** Gene signature of myeloid and endothelial sub-clusters.

13 **Figure S6.** Assessment of systemic depletion efficiency and analysis of viral titers in mice  
14 with abrogated viral clearance mechanisms.

15 **3. Supplemental Tables (1 Table)**

16 **Table S1.** SARS-CoV-2 mutations identified among viral reads isolated from fLX at 2 dpi.

17 **4. Supplemental References**

18

19

20

21

22

23

24

25

26

## 27 SUPPLEMENTAL MATERIALS AND METHODS

### 28 **Resources**

29 **Cell lines.** VeroE6 cells were grown in Dulbecco's modified Eagle's medium (DMEM)  
30 supplemented with 10% heat inactivated fetal bovine serum (Bio-Techne, R&D systems,  
31 Minneapolis, MN, USA) and 1% (v/v) Penicillin Streptomycin (Thermo Scientific, Waltham, MA,  
32 USA).

33

34 **Antibodies.** The anti-mouse antibody CD45-PE-Dazzle5 clone 30-F11 was purchased from  
35 BioLegend (San Diego, CA, USA) and used for flow cytometry. The following anti-human  
36 antibodies were used for flow cytometry and were all acquired from BD Biosciences (San Jose,  
37 CA, USA): HLA-DR-BV510 clone L243, CD3-BV605 clone UCHT1, CD20-BV650 clone 2H7,  
38 CD16 (Fc $\gamma$ RIII)-BV117 clone B73.1, CD45-BV785 clone H130, CD8-FITC clone RPA-T8, CD33-  
39 PE clone WM53, CD14-PerCP-Cy5.5 clone HCD14, CD45RA-PE-Cy7 clone HI100, CD56-  
40 allophycocyanin clone QA17A16, CD4-Alexa Fluor 700 clone SK3. The following anti-human  
41 antibodies were used for *in vivo* depletions: From Bio-X Cell (Lebanon, NH, USA): anti-human  
42 CD3 clone OKT3, anti-human CD4 clone OKT4, anti-human CD8 clone OKT8; From  
43 Thermofisher: mouse IgG2a isotype. The anti-SARS-CoV-2 (2019-nCoV) Spike RBD-mFc clone  
44 #57 used as a control for neutralization assays was acquired from Sino Biologicals.

45

### 46 **Experimental methods**

47 **Generation of BLT-L mice.** BLT mice were generated via irradiation of female NOD.Cg.-  
48 *Prkdc*<sup>Scid</sup>*Il2rg*<sup>tm1Wjl</sup>/SzJ mice (NSG mice; Jackson Laboratory #005557) with 200 rads from an X-  
49 ray irradiator. Mice then underwent surgery to implant 1mm<sup>3</sup> of human fetal thymic and fetal liver  
50 tissue (Advanced Bioscience Resources) under the murine kidney capsula. After the blunt  
51 resection of the thoracic subcutis, through the same surgical opening, two pieces of homologous  
52 human fetal lung tissue into the subcutaneous dorsal area of the 8-15 week old females. Post-

53 implantation, mice intravenously received  $1 \times 10^5$  homologous CD34+ cells. Human immune  
54 reconstitution was determined by flow cytometry at weeks post implantation. Three distinct human  
55 donors were used for this study.

56

57 **Generation of SARS-CoV-2 isolate and recombinant SARS-CoV-2 NanoLuc viral stocks.** All  
58 replication-competent SARS-CoV-2 experiments were performed in a BSL-3 facility at the Boston  
59 University National Emerging Infectious Diseases Laboratories. The clinical isolate named 2019-  
60 nCoV/USA-WA1/2020 strain (NCBI accession number: MN985325) of SARS-CoV-2 was  
61 obtained from BEI Resources (Manassas, VA, USA). Recombinant SARS-CoV-2 expressing  
62 NanoLuc Luciferase (rSARS-CoV-2 NL) (Xie et al., 2020) was graciously provided by the  
63 Laboratory of Pei-Yong Shei. Viral stocks were grown and purified as previously described  
64 (reference HNFL manuscript). Briefly,  $1 \times 10^7$  Vero E6 cells were plated in a T-175 flask the day  
65 prior to virus generation. The next day, cells were infected with virus diluted in 10 mL of Opti-MEM  
66 (ThermoFisher Scientific, Waltham, MA, USA) and incubated for 1 h at 37°C to allow for virus  
67 adsorption. After 1 h, 15 mL of DMEM containing 10% FBS and 1% penicillin/streptomycin was  
68 added to cells and incubated overnight. The next day, media was removed, cells were rinsed with  
69 1X PBS, pH 7.5 (ThermoFisher Scientific) and 25 mL of fresh DMEM containing 2% FBS was  
70 added. Cells were assessed for cytopathic effect (CPE), media was collected, filtered with a 0.22  
71  $\mu\text{m}$  filter, and concentrated by sucrose gradient. Concentrated virus was suspended in sterile 1X  
72 PBS, pH 7.5, aliquoted and stored at  $-80^\circ\text{C}$ .

73

74 **Viral quantification by plaque assay.** The titer of our viral stocks was determined by plaque  
75 assay. Vero E6 cells were seeded into a 12-well plate at a density of  $2 \times 10^5$  cells per well. The  
76 next day, cells were infected with 10-fold serial dilutions of the viral stocks and incubated for 1  
77 hour at 37°C to allow for viral adsorption. After 1 hour incubation, 1 mL of overlay media (1.2%  
78 Avicel (DuPont, Wilmington, DE, USA; RC-581) in DMEM supplemented with 2% FBS and 1%

79 Pen/Strep) was added to each well. Three days later, the overlay media was removed, and cells  
80 were fixed for 1 hour at room temperature with 10% neutral buffered formalin (ThermoFisher  
81 Scientific). Formalin was removed after fixation and cells were stained for 30 min at room  
82 temperature with 0.1% crystal violet (Sigma-Aldrich) prepared in 10% ethanol/water. Crystal violet  
83 was removed, cells were washed with water and plaque forming units were counted to determine  
84 viral titers.

85

86 **Generation of single cell suspension from mouse blood.** Blood processing was performed as  
87 previously described (1). Briefly, blood was collected via submandibular bleeding or heart  
88 puncture and transferred into EDTA capillary collection tubes (Microvette 600 K3E; Sarstedt,  
89 Nümbrecht, Germany). Blood was centrifuged at 3,500 RPM for 10 minutes at room temperature,  
90 serum was removed, and whole blood was subject to ACK lysing (ThermoFisher Scientific;  
91 #A1049201) for 10 minutes at room temperature. Lysing was quenched with 10% (v/v) FBS  
92 DMEM media and cells were washed twice with a 1% (v/v) FBS-PBS solution (FACS Buffer)  
93 before downstream processing.

94

95 **Generation of single cell suspension from fLX.** Fetal lung xenografts were processed as  
96 previously described (1). Briefly, lung tissues were placed in a 60 mm dish, minced using a  
97 disposable scalpel, then transferred into a 15 mL conical tube containing 3 mL of digestion buffer  
98 (HBSS minus Ca<sup>2+</sup>, Mg<sup>2+</sup>, and phenol red, 0.5 mg/mL Liberase TM, 1 mg/mL DNase I) and  
99 incubated at 37°C for 30 min with agitation every 10 min. After digestion, tissue was passed  
100 through a 70 µm strainer on a 50 mL tube, mashed using the plunger of a 3 mL syringe and  
101 washed twice with 1 mL FACS buffer. Cell suspension was centrifuged at 300 x g for 5 minutes  
102 at 4°C, suspended in 1 mL of ACK lysing buffer, and incubated for 2 min at room temperature.  
103 After incubation, lysis was quenched with 12 mL of FACS buffer, cell suspension was centrifuged

104 at 300 x g for 5 min at 4°C, and the cell pellet was suspended in 1 mL of FACS buffer prior to  
105 downstream processing.

106

107 ***Viral RNA extraction from serum.*** Viral RNA was extracted from serum using a Zymo Viral RNA  
108 extraction kit (Zymo Research, Irvine, CA, USA: #R1035) following the manufacturers protocol.  
109 Briefly, serum was mixed with RNA/DNA shield (Zymo) at a 1:1 ratio. RNA buffer was then added  
110 to the serum (2:1 ratio) and passed through a column by centrifugation at 13,000 x g. The column  
111 was then washed twice, and RNA was eluted with 15 µL of RNase/DNase free water.

112

113 ***RNA extraction from fLX.*** During necropsy a piece of fLX tissue was placed in 600 µL of  
114 RNALater (MilliporeSigma: #R0901500ML) and stored at -80°C until analysis. For RNA extraction,  
115 20–30 mg of tissue was weighed out, placed into a 2 mL tube with 600 µL of RLT buffer with 1%  
116 β-mercaptoethanol and a 5 mm stainless steel bead (Qiagen, Hilden, Germany: #69989), then  
117 dissociated using a Qiagen TissueLyser II (Qiagen) with the following cycle: two min dissociation  
118 at 1800 oscillations/min, one min rest, two min dissociation at 1800 oscillations/min. Dissociated  
119 tissues were centrifuged at 13,000 rpm for 10 min at room temperature and cleared supernatant  
120 was transferred to a new 1.5 mL eppendorf tube. RNA extractions were performed using a Qiagen  
121 RNeasy Plus Mini Kit (Qiagen: #74134), according to the manufacturer's instructions (Qiagen:  
122 #79256). RNA was eluted in 30 µL of RNase/DNase free water and quantified by Nanodrop.

123

124 ***fLX processing for viral titer quantification.*** Tissue pieces stored in RNALater were thawed at  
125 room temperature and then 22-40 mg of tissue were weighed out and placed into 600 uL of  
126 OptiMEM (ThermoFisher Scientific). Tissues were homogenized using a Qiagen TissueLyser II  
127 with two dissociation cycles, centrifuged and supernatant was transferred to a new 1.5 mL  
128 Eppendorf tube (see "*RNA extraction from fLX*" section). Tissue homogenates were then serial  
129 diluted ( $10^{-1}$  –  $10^{-6}$ ) and 300 uL of supernatant was plated on VeroE6 cells in 12-well plates ( $2 \times 10^5$

130 cells/well). Supernatant was incubated for 1 hour at 37°C to allow for viral adsorption then 1 mL  
131 of a 1:1 mixture of 2X DMEM 4% FBS 2% penicillin/streptomycin and 2.4% Avicel (Dupont) was  
132 overlaid onto each well. Plates were incubated for 72 hours at 37°C with 5% CO<sub>2</sub>. Avicel was then  
133 removed, cells were fixed in 10% buffered formalin (ThermoFisher Scientific) for 1 hour, then  
134 stained with 0.1% crystal violet in 10% ethanol/H<sub>2</sub>O for 30 minutes before washing and  
135 quantification.

136

137 **Serum neutralization assay.** One day prior to the experiment, 1 × 10<sup>4</sup> Vero E6 cells were plated  
138 into a 96-well plate. Serum was de-complemented at 56 °C for 30 min and an initial dilution of 1:10  
139 was prepared in OptiMEM. Two-fold dilutions were subsequently prepared and mixed with  
140 rSARS-CoV-2 NL virus (MOI = 1) for 1 h at room temperature and then plated onto cells. After a  
141 1-h incubation at 37 °C inoculum was removed and 200 µL of fresh DMEM containing 2% FBS  
142 and 1% penicillin/streptomycin was added. After a 24 h incubation at 37 °C with 5% CO<sub>2</sub> media  
143 was removed and cells were fixed with 10% formalin for 1 h. A SARS-CoV-2 spike neutralizing  
144 antibody (Sino Biological Inc., Beijing, China; 2 µg/µL; Clone #57) was used as a positive control.  
145 Cells were washed with 1× PBS and 20 µM furimazine (MedChem Express, Monmouth Junction,  
146 NJ, USA) luciferin substrate was added onto cells. Cells were then imaged using an IVIS spectrum  
147 imager (PerkinElmer) and analyzed using LivingImage software (PerkinElmer). Titers were  
148 determined as the reciprocal of the highest dilution with >50% reduction of cytopathic effect.

149

150 **Quantification of peripheral human chimerism in BLT-L mice.** 2–4×10<sup>6</sup> PBMCs of human or  
151 murine origin were isolated as described above and stained for 1 hour at 4°C in the dark with an  
152 antibody cocktail targeting human(h)CD45, mouse CD45, hCD3, hCD4, hCD8, hCD16, hCD19,  
153 hCD11c, hCD56 and hCD14. Following washing with FACS Buffer, cells were fixed with fixation  
154 buffer (1% (v/v) FBS, 4% (w/v) PFA in PBS) for 30 min at 4°C in the dark. Chimerism of all  
155 humanized mice was assessed by quantifying the following human populations: Human CD45+,

156 human CD45+ murine CD45-; T-cells, CD45+ CD3+; CD4+ T cells, CD45+ CD3+ CD4+; CD8+ T  
157 cells, CD45+ CD3+ CD8+; CD45+ CD16+ leukocytes; B-cells, CD45+ CD19+; conventional  
158 dendritic cells, CD45+ CD11c+; NK/NKT cells, CD45+ CD56+; Monocytes, CD45+ CD14+.

159  
160 **Antibody staining.** After generation of single cell suspension,  $5 \times 10^5$  -  $1 \times 10^6$  cells were used for  
161 flow cytometry staining. Cells were centrifuged at 300 X g for 5 min at 4°C. The cell pellet was  
162 resuspended in a mix of 22.5  $\mu$ L FACS buffer and 2.5  $\mu$ L of FcX (Biolegend; #422302) and  
163 incubated for 10 min at room temperature. After blocking, 25  $\mu$ L of antibody cocktail targeting  
164 hCD3, hCD20, hCD16, hHLA-DR, hCD45, hCD8, hCD4, hCD33, hCD45RA, hCD56, hCD14,  
165 mCD45, and containing a LIVE/DEAD viability dye (ThermoFisher Scientific) was added to each  
166 sample and incubated in the dark for 30 min at 4°C. After staining, 1 mL of FACS buffer was  
167 added to each sample, samples were centrifuged at 300 x g for 5 min, washed with 1 mL FACS  
168 buffer, centrifuged at 300 x g for 5 min, and then fixed in 200  $\mu$ L 4% PFA for 30 min. After fixation  
169 cells were washed twice with 1 mL FACS buffer, resuspended in FACS buffer, and stored  
170 protected from light at 4°C until analysis. Human immune cell subsets were gated as follows:  
171 human CD45+, hCD45+ mCD45-; human CD3+, hCD45+ hCD3+; human CD4+, hCD45+ hCD3+  
172 hCD4+; human CD8+, hCD45+ hCD3+ hCD8+.

173  
174 **Flow cytometry analysis.** For all flow cytometry experiments, flow cytometric analysis was  
175 performed using an LSRII Flow Cytometer (BD Biosciences) or Cytex Aurora instrument (Cytex  
176 Biosciences). Flow cytometry fluorophore compensation for antibodies was performed using an  
177 AbC™ Anti-Mouse Bead Kit (ThermoFisher Scientific). Flow cytometry data were analyzed using  
178 FlowJo software (TreeStar, Ashland, OR, USA).

179  
180 **Histologic processing and analysis.** Tissue samples were fixed for 72 h in 10% neutral buffered  
181 formalin, processed in a Tissue-Tek VIP-5 automated vacuum infiltration processor (Sakura

182 Finetek USA, Torrance, CA, USA), followed by paraffin embedding using a HistoCore Arcadia  
183 paraffin embedding station (Leica, Wetzlar, Germany). Generated formalin-fixed, paraffin-  
184 embedded (FFPE) blocks were sectioned to 5  $\mu$ m using a RM2255 rotary microtome (Leica),  
185 transferred to positively charged slides, deparaffinized in xylene, and dehydrated in graded  
186 ethanol. Tissue sections were stained with hematoxylin and eosin for histologic examination, while  
187 unstained slides were used for immunohistochemistry. Qualitative and semi-quantitative  
188 histomorphological analyses were performed by a single board-certified veterinary pathologist  
189 (N.A.C.). An ordinal scoring system was developed to capture the heterogeneity of histologic  
190 findings in fLX. Individual histologic findings that were scored included: syncytial cells, hyaline  
191 membranes, intra-airspace neutrophils and necrosis, hemorrhage, edema, denuded  
192 pneumocytes, capillary fibrin thrombi, intermediate vessel fibrin thrombi and coagulative necrosis.  
193 The entire fLX was examined at 200x with a DM2500 light microscope (Leica) using the following  
194 criteria: 0 = not present, 1 = found in <5% of fields, 2 = found in >5% but <25% of fields, or 3 =  
195 found in >25% of fields. Several criteria were also restricted to 'not observed' (0) or 'observed'  
196 (1). Scores were combined to generate a cumulative lung injury score.

197  
198 ***Histological Antibodies.*** The following primary antibodies from Cell Signaling Technology  
199 (Danvers, MA, USA) were used: rabbit anti-human/mouse PAPRg (clone C26H12), rabbit anti-  
200 human CD4 (clone EP204), rabbit anti-human CD163 (clone D6U1J), rabbit anti-human CD3e  
201 (clone D7A6E), mouse anti-MHC class I (clone EMR8-5), and mouse anti-SARS-CoV-2 Spike (S)  
202 (clone E7U6O/2B3E5J). The secondary antibody used in this study included HRP Goat anti-Rabbit  
203 IgG (H&L) (Vector Laboratories, Burlingame, CA, USA). For mouse derived primary antibodies, a  
204 linker antibody (Abcam) was used prior to application of the secondary antibody to prevent non-  
205 specific binding. DAB chromogen (Roche) and chromogens used for TSA-conjugated Opal 480,  
206 520, 570, and 620 fluorophores (Akoya Biosciences, Marlborough, MA, USA) were utilized to  
207 develop immunohistochemical assays. The following anti-SARS-CoV-2 antibodies were used for



208 immunohistochemistry: rabbit polyclonal anti-SARS-CoV Nucleoprotein (Novus Biological,  
209 Littleton, CO, USA), mouse monoclonal anti-SARS-CoV-2 Spike clone 2B3E5 (This antibody was  
210 used in this study as clone E7U60, which was the pre-production clone ID of clone 2B3E5; Cell  
211 Signaling Technology).

212  
213 **Multispectral fluorescent imaging.** Fluorescently labeled slides were imaged using either a  
214 Mantra 2.0™ or Vectra Polaris™ Quantitative Pathology Imaging System (Akoya Biosciences).  
215 To maximize signal-to-noise ratios, fluorescently acquired images were spectrally unmixed using  
216 a synthetic library specific for the Opal fluorophores used in each assay plus DAPI. An unstained  
217 fLX section was used to create an autofluorescence signature that was subsequently removed  
218 from multispectral images using InForm software version 2.4.8 (Akoya Biosciences).

219  
220 **Transmission electron microscopy.** Tissue samples were fixed for 72 h in a mixture of 2.5%  
221 glutaraldehyde and 2% formaldehyde in 0.1 M sodium cacodylate buffer (pH 7.4). Samples were  
222 then washed in 0.1 M cacodylate buffer and postfixed with 1% osmium tetroxide (OsO<sub>4</sub>)/1.5%  
223 potassium ferrocyanide (K<sub>4</sub>Fe(CN)<sub>6</sub>) for 1 h at room temperature. After washes in water and 50 mM  
224 maleate buffer pH 5.15 (MB), the samples were incubated in 1% uranyl acetate in MB for 1 h,  
225 washed in MB and water, and dehydrated in grades of alcohol (10 min each: 50%, 70%, 90%,  
226 2x10 min 100%). The tissue samples were then put in propyleneoxide for 1 h and infiltrated  
227 overnight in a 1:1 mixture of propyleneoxide and TAAB Epon. The following day the samples were  
228 embedded in fresh TAAB Epon and polymerized at 60°C for 48 h. Semi-thin (0.5 µm) and ultrathin  
229 sections (50-80 nm) were cut on a Reichert Ultracut-S microtome (Leica). Semi-thin sections were  
230 picked up on glass slides and stained with toluidine blue for examination by light microscopy to  
231 find affected areas in the tissue. Ultrathin sections from those areas were picked up onto  
232 formvar/carbon coated copper grids, stained with 0.2% lead citrate and examined in a JEOL

233 1200EX transmission electron microscope (JOEL, Akishima, Tokyo, Japan). Images were  
234 recorded with an AMT 2k CCD camera.

235  
236 **Bulk RNA sequencing.** Total RNA was processed from fLX as described above, and sent to BGI  
237 genomics (Hong Kong, China) for library preparation and sequencing (Pair-ends, 100 bp, 20M  
238 reads per sample). Raw FASTQ files were quality-checked with FastQC v0.11.7. Reads were  
239 found to be excellent quality and were aligned to the combined human (GRCh38, Ensembl 101)  
240 and mouse (GRCm38, Ensembl 101) genomes with STAR v2.7.1a (2) followed by quantification  
241 with featureCounts v1.6.2 (3). Quality was checked with MultiQC v1.6. All samples passed quality  
242 thresholds of >75% sequences aligned and >15 million aligned reads per sample. Significantly  
243 up- and downregulated genes were identified with DESeq2 v1.23.10 in R v3.6.0. (4). Each post-  
244 infection timepoint was compared to naïve: 2 dpi vs. naïve, and 12 dpi vs. naïve. P-values were  
245 FDR-adjusted, and log<sub>2</sub> fold change was shrunk with the apeglm method. Significance was  
246 determined by an FDR-adjusted  $p < 0.01$  and a shrunken log<sub>2</sub> fold change  $> 2$  or  $< -2$ . DESeq2 result  
247 were imported into Ingenuity Pathway Analysis (IPA; Service curated by Qiagen; Access provided  
248 through the Boston University Genome Science Institute) (5), and a canonical pathway  
249 enrichment analysis was performed using the default settings and the same differential  
250 expression thresholds as before (shrunken log<sub>2</sub> fold change  $> 2$  or  $< -2$  and FDR-adjusted p-  
251 value  $< 0.01$ ).

252  
253 **Single-cell barcoding and sequencing.** Following fLX processing into single-cell suspension as  
254 described above, cells were frozen down in a 90% FBS (Bio-Techne, R&D systems) 10% DMSO  
255 solution (ThermoFisher Scientific) and kept at -80°C. Four to five days following freezing, cells  
256 were thawed, and viability was assessed using Trypan blue (Fisher Scientific). Samples with  
257  $\geq 90\%$  viability were then processed using the Chromium Next GEM Single Cell 3' GEM, Library  
258 & Gel Bead Kit v3.1, as per manufacturer instructions, and single-cell barcoding was performed

259 using a Chromium instrument (10x genomics) located in the NEIDL BSL-3. Reverse transcription  
260 of RNAs was performed in the BSL-3 using a thermocycler (Applied Biosciences), and cDNA was  
261 then removed from containment. Full-length, barcoded cDNAs were then amplified by PCR to  
262 generate sufficient mass for library construction. Enzyme fragmentation, A tailing, adaptor ligation  
263 and PCR were then performed at the Boston University single-cell sequencing core to obtain final  
264 libraries containing P5 and P7 primers used in Illumina bridge amplification. Size distribution and  
265 molarity of resulting cDNA libraries were assessed via Bioanalyzer High Sensitivity DNA Assay  
266 (Agilent Technologies, USA). All cDNA libraries were sequenced on an Illumina NextSeq 500  
267 instrument at the Boston University microarray and sequencing core according to Illumina and  
268 10x Genomics guidelines with 1.4-1.8pM input and 1% PhiX control library spike-in (Illumina,  
269 USA).

270

### 271 ***Single-cell RNA sequencing analysis.***

272 Sequencing data was processed via 10X Genomics Cell Ranger 6.0.2. A custom reference was  
273 built from the combined human (GRCh38, Ensembl 101) and mouse (GRCm38, Ensembl 101)  
274 genomes. FASTQ files were generated from raw Illumina BCL files using *cellranger mkfastq*.  
275 FASTQ files were aligned to the custom reference and quantified with *cellranger count*.  
276 Quantification outputs were loaded and analyzed in R with the Seurat package (4.0.2, (6)). Cells  
277 with nFeature\_RNA between 200 and 7500, and MT.percent<= 50 were analyzed. The dataset  
278 was normalized and scaled, and cell cycle scores (S+G2M) and nCount\_RNA were regressed.  
279 Seurat's RunPCA function was used to determine the number of PCA used for subsequent  
280 analysis. FindClusters function was used to cluster cells. RunUMAP function was used for UMAP  
281 visualization. A human score was calculated using all human genes, to discriminate between  
282 mouse and human cells (**Fig. S3A-C**). Human cells were kept for subsequent analysis. The  
283 following ("dimension";"resolution") parameters were used to cluster the whole human dataset  
284 (15;0.1), epithelial cells (10;0.3), mesenchymal (10;0.4), endothelial (10;0.5), T cell/ILC (12;0.4),

285 and Myeloid cells (10;0.2). B cell, endothelial cell, epithelial cell, mesenchymal cell, and mast cell  
286 clusters were identified by scoring using gene lists defined for lung subsets in the COVID-19 atlas  
287 of ToppCell (**Fig. S3D**) (7). For chondrocytes, which are not present in this dataset, we used the  
288 following gene list *ACAN*, *ITGA10*, *CYTL1*, *HAPLN1*, *SNORC*, *COL2A1*, *COL9A2*, *COL11A2*,  
289 *SOX9*, *SOX6*, *ZBTB16*, *FOXC1*, and *GATA2*. For T cells and ILC, a manually curated gene list  
290 based on ToppCell was used. Consensus signature genes from LGEA LungMAP (8) were used  
291 to validate each cluster. Differentially expressed genes between clusters and conditions were  
292 identified using FindMarkers. Only genes showing expression in at least 10% of cells in one of  
293 the groups compared,  $p\_val\_adj < 0.05$ , and  $abs(fold\ change) > 2$  were considered.

294

295 **Sequencing of SARS-CoV-2 virus from fLX.** Viral sequences were amplified using a modified  
296 version of the ARTIC3 tiled amplicon sequencing protocol (9, 10) and sequenced on an Illumina  
297 MiSeq V3 600 cycle kit. Viral RNA was extracted from fLX as described above in “*RNA extraction*  
298 *from fLX*”. cDNA was synthesized from the viral RNA using a mix of random hexamer and oligo-  
299 dT primers (IDT) and SSIV reverse transcriptase (Thermo Fisher). Tiled amplicons were amplified  
300 using Q5 Hot Start polymerase (NEB) and the pooled primers described in ARTIC3 (9, 10).  
301 Illumina sequencing adaptors were ligated onto the amplicons using the NEBNext Adaptor kit for  
302 Illumina (NEB). The amplicons were then pooled, cleaned up, and size selected using AMPureXP  
303 beads (Beckman Coulter). The pooled library was quantified using Tape Station (Agilent) and Qbit  
304 (Thermo Fisher) kits. The library was sequenced on a MiSeq with a V3 600 cycle kit (Illumina).  
305 Sequencing reads were filtered, trimmed, and mapped to the D-WA reference sequence  
306 (Geneious). Variants were called using the Geneious variant caller, with a minimum frequency  
307 threshold of 25%. Each positive variant was visually inspected.

308

309

310 **SUPPLEMENTAL FIGURES**

311

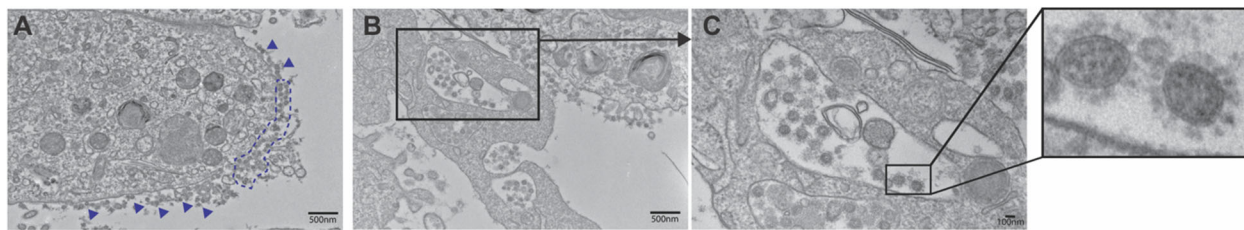

312

313 **Figure S1. BLT-L mice are susceptible to SARS-CoV-2 infection. (A-C)** Transmission electron  
 314 microscopy (TEM) of fLX tissue sections extracted from BLT-L mice at 2 dpi illustrating virus  
 315 particles at the cell surface as indicated by the blue arrows and blue dotted line **(A)** and viral  
 316 particles in AT2 cells as evident by presence of lamellar bodies **(B,C)**. Scale bars indicated on  
 317 image.

318

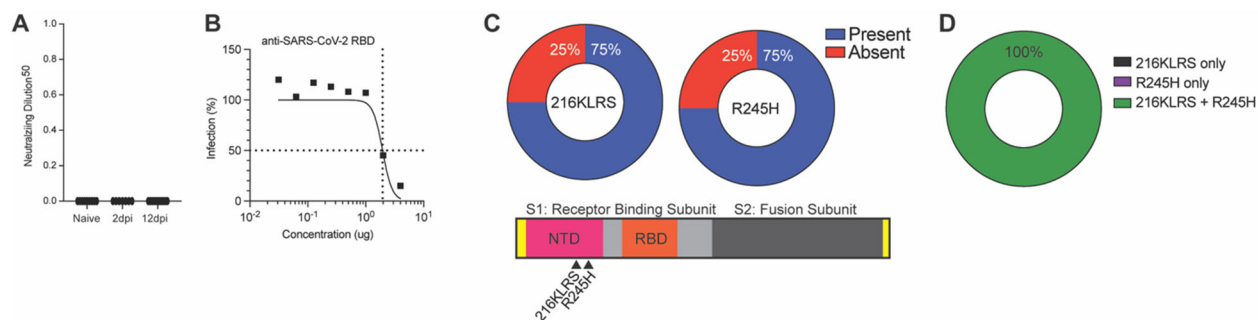

319

320 **Figure S2. SARS-CoV-2 undergoes viral adaptation within fLX. (A)** Neutralizing efficacy  
 321 (ND50 values) of serum extracted from naïve or infected mice BLT-L mice (2 and 12 dpi). Assay  
 322 was performed using VeroE6 cells and a recombinant WA-1 SARS-CoV-2 virus expressing  
 323 NanoLuc. **(B)** Titration of the neutralizing activity of an anti-RBD antibody (serving as positive  
 324 control) against WA-1 SARS-CoV-2 virus expressing NanoLuc. **(C-D)** SARS-CoV-2 virus isolated  
 325 from 2 dpi fLX was deep sequenced and assessed for mutations relative to the inoculation (WA-  
 326 1) strain. **C Upper panel:** Pie chart depicting the percentage of fLX with virus containing 216KLRS  
 327 insertion and R245H non-synonymous mutation. **C Lower Panel:** Schematic representation of

328 SARS-CoV-2 spike protein highlighting the location of mutations. *Not to scale.* **D:** Pie chart  
 329 depicting the percentage of fLX with virus that showed signs of co-evolution of 216KLRs and  
 330 R245H.  
 331

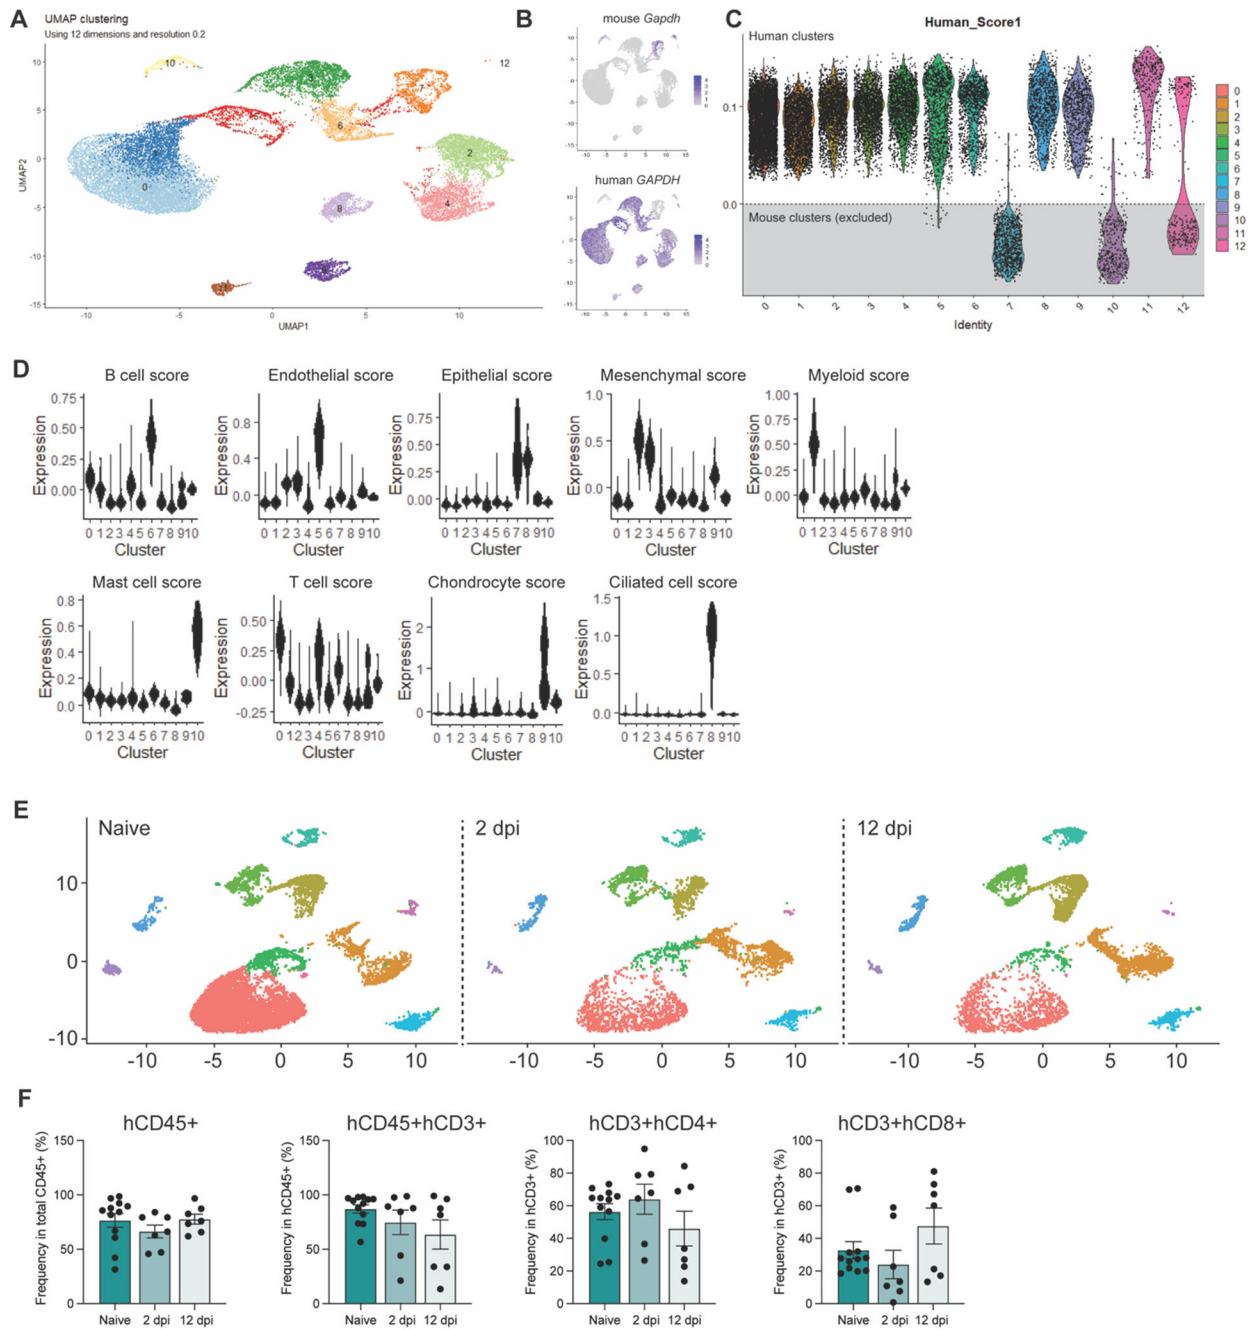

332

333 **Figure S3. Single-cell RNA sequencing analysis of fLX upon SARS-CoV-2 infection. (A-E)**  
334 Single cell RNA sequencing was performed on naïve fLX and infected fLX (at 2- and 12 dpi).  
335 Sequencing reads were aligned to a combined human, mouse and SARS-CoV-2 viral genome.  
336 **(A)** UMAP plot clustering on all cell (human and mouse) populations detected. **(B)** Expression of  
337 mouse (top) and human *GAPDH* (bottom) in all clusters. **(C)** A human score was applied to each  
338 cluster to identify human clusters (above dotted line) and mouse clusters (below dotted line; gray  
339 zone). Mouse clusters were removed from downstream analysis. **(D)** Cell scoring system applied  
340 to human cell clusters to classify each cluster. **(E)** UMAP clustering of human cells separated by  
341 time point (naïve: left, 2 dpi: center, and 12 dpi: right). **(F)** Flow cytometric analysis showing  
342 frequency of hCD45+, hCD3+, hCD4+, and hCD8+ cells among PBMCs extracted from the blood  
343 of naïve and infected BLT-L mice at 2-, 6-, and 12 dpi.  
344

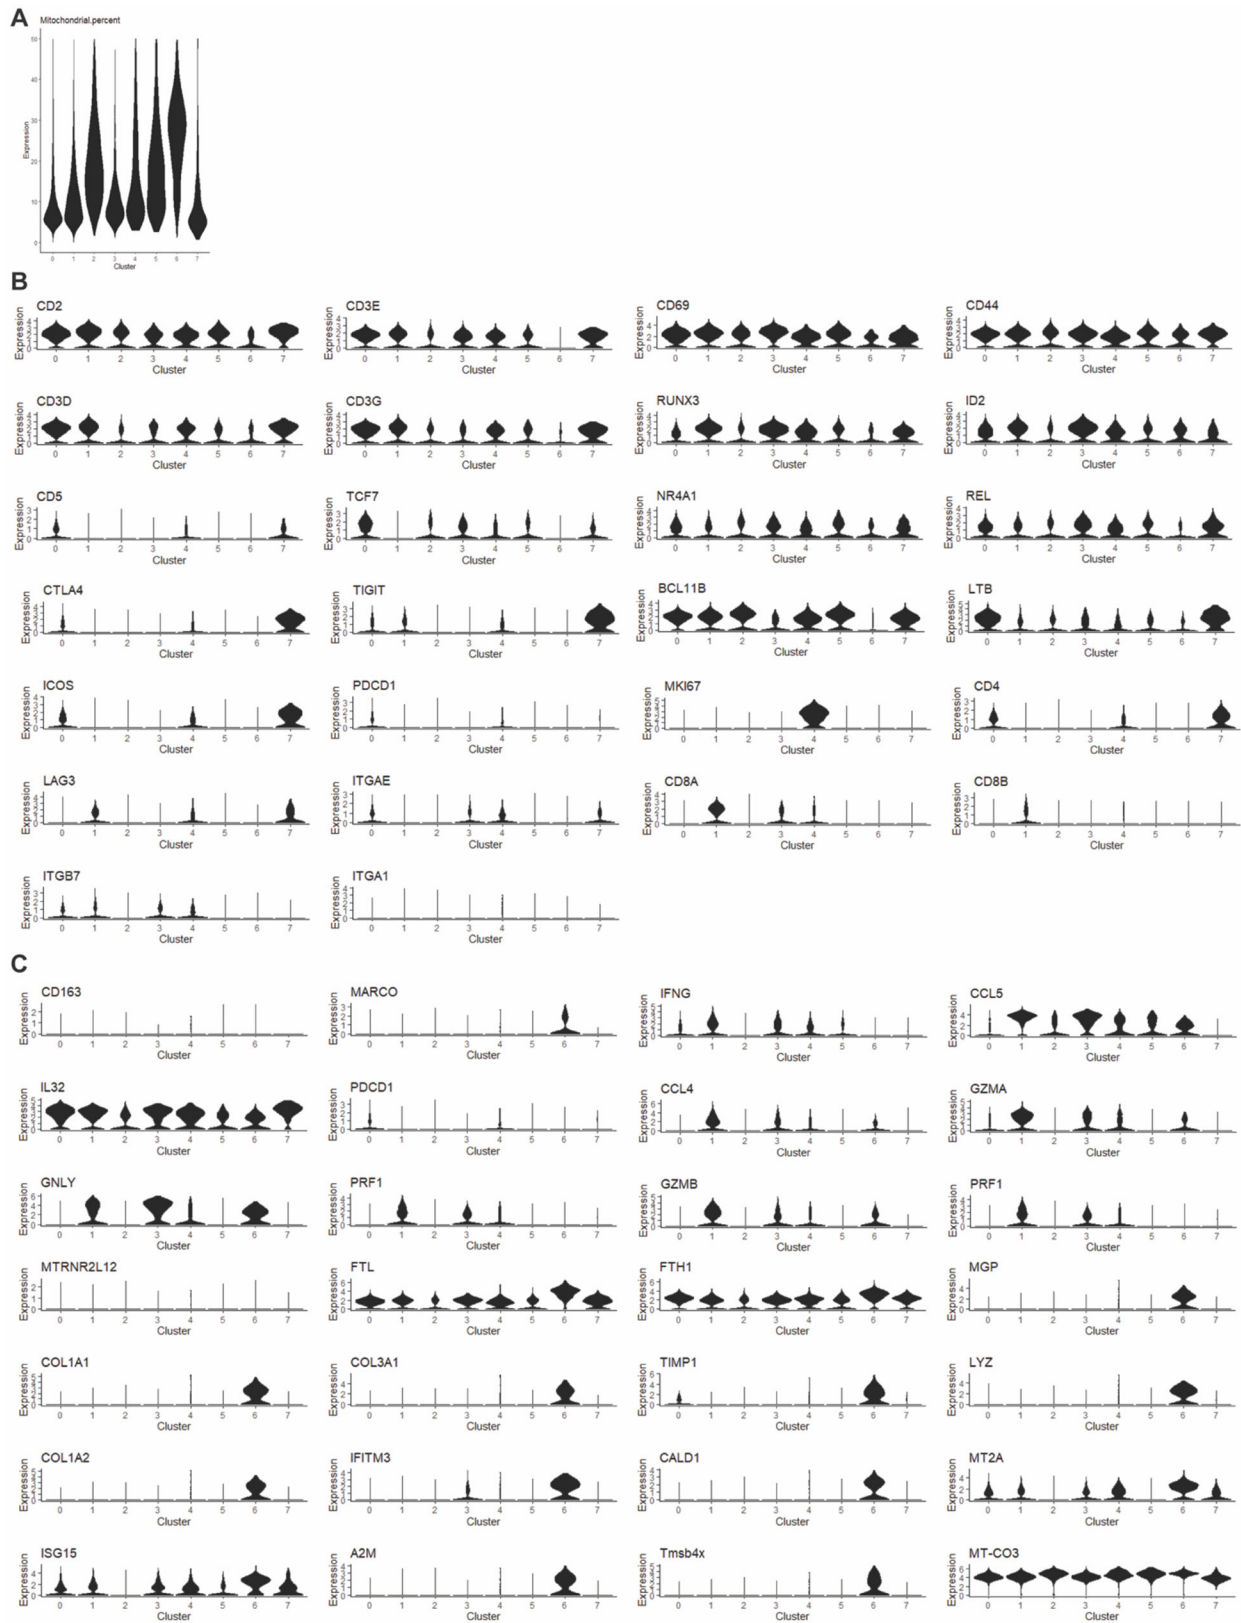



346 **Figure S4. Gene signature of macrophage-like T cells.** (A) Mitochondrial gene expression  
 347 among the different T cell sub-clusters. (B) Expression of T-cell associated genes among the  
 348 different T-cell sub-clusters. (C) Expression of myeloid/macrophage-associated genes among the  
 349 different T-cell sub-clusters.  
 350  
 351

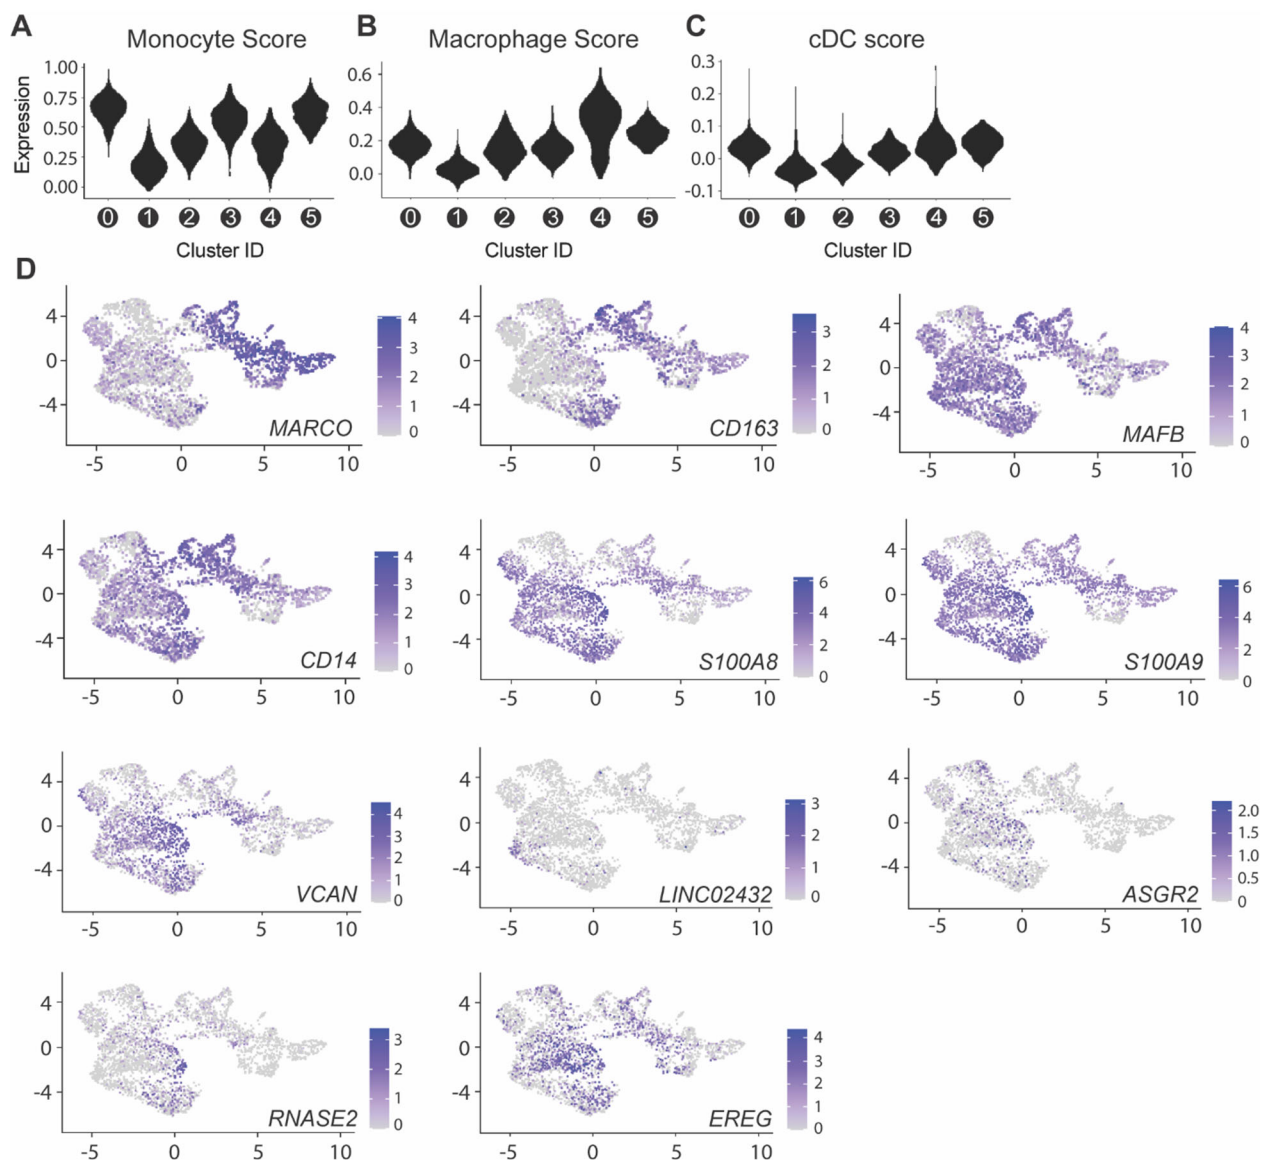

352  
 353 **Figure S5. Gene signature of myeloid and endothelial sub-clusters.** (A-C) Violin plot  
 354 displaying monocyte (A), macrophage (B) and dendritic cell (C) gene signature score for each

355 myeloid sub-cluster. **(D)** UMAP plots representing the expression of several myeloid markers that  
 356 were employed to further define the identity of the different myeloid sub-clusters.  
 357

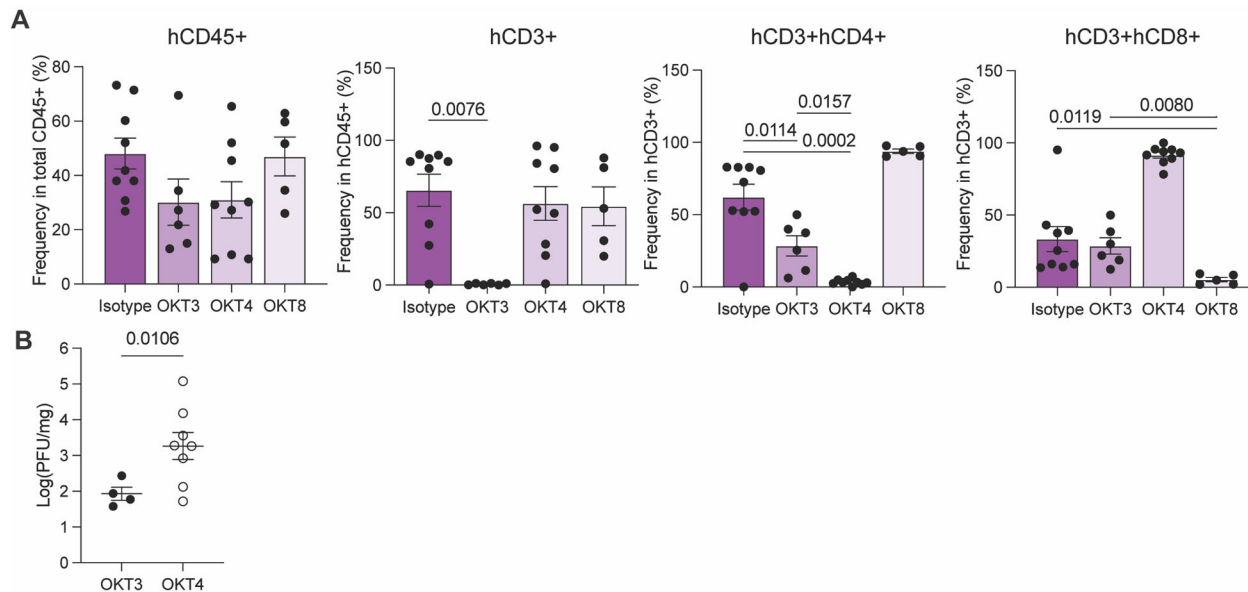

358  
 359  
 360 **Figure S6. Assessment of systemic depletion efficiency and analysis of viral titers in mice**  
 361 **with abrogated viral clearance mechanisms. (A)** Flow cytometric analysis showing the  
 362 frequency of hCD45+, hCD3+, hCD3+ hCD4+, and hCD3+ hCD8+ cells among PBMCs extracted  
 363 from the blood of BLT-L mice treated with an isotype antibody, OKT3, OKT4 or OKT8 antibody.  
 364 Error bars represent mean  $\pm$  SEM. *One-way ANOVA. P-value indicated on graph.* **(B)** Viral titer  
 365 (log(PFU/mg)) of CD3+ cell (OKT3) and CD4+ cell-depleted (OKT4) fLX that were positive for  
 366 viral infection. *Unpaired, non-parametric T-test. P-value indicated on graph.*

367  
 368  
 369  
 370  
 371

372 **SUPPLEMENTAL TABLES**

| Sample             | Mutations                         | Notes                                                                                               |
|--------------------|-----------------------------------|-----------------------------------------------------------------------------------------------------|
| 2 dpi - 1          | Spike 216KLRS insertion 99%       | There is a deletion at spike 221, but there is very low coverage (only 2x)                          |
|                    | Spike R245H - 100%                |                                                                                                     |
| 2 dpi - 2          | orf1ab K1051 insertion - 28%      | no mutations in spike, but spike had no coverage at AA sites 216 and 245                            |
| 2 dpi - 3          | Spike 216KLRS insertion 100%      |                                                                                                     |
|                    | Spike R245H - 100%                |                                                                                                     |
| 2 dpi - 4          | Spike 216KLRS insertion 91%       |                                                                                                     |
|                    | Spike R245H - 100%                |                                                                                                     |
| 2 dpi - 5          | Spike 216KLRS insertion 81%       |                                                                                                     |
|                    | Spike R245H - 100%                |                                                                                                     |
| 2 dpi - 6          | Spike 216KLRS insertion 96%       |                                                                                                     |
|                    | Spike R245H - 99%                 |                                                                                                     |
|                    | NS6 S43P - 30%                    |                                                                                                     |
| 2 dpi - 7          | Spike 216KLRS insertion 98%       |                                                                                                     |
|                    | Spike R245H - 100%                |                                                                                                     |
| 2 dpi - 8          | orf1ab V1866 del (frameshift) 35% | low coverage at AA sites 216 and 245, but there is 1 read supporting the presence of both mutations |
|                    | orf1ab V3048L 33%,                |                                                                                                     |
|                    | NS3 - F168 del (frameshift)- 47%, |                                                                                                     |
| WA1 positive stock | Spike E96A - 51%                  |                                                                                                     |
|                    | Spike 678-690 deletion 87%        |                                                                                                     |
|                    | NS7b 43 - NS8 1 deletion 50%      |                                                                                                     |

373

374 **Table S1.** SARS-CoV-2 mutations identified among viral reads isolated from fLX at 2 dpi and from

375 our concentrated viral stock (i.e., WA1 positive stock used to inoculate fLX), as compared to the

376 Wuhan-1 consensus sequence.

377

378

379 **SUPPLEMENTAL REFERENCES**

- 380 1. D. J. Kenney *et al.*, Humanized mice reveal a macrophage-enriched gene signature  
381 defining human lung tissue protection during SARS-CoV-2 infection. *Cell Rep* **39**, 110714  
382 (2022).
- 383 2. A. Dobin *et al.*, STAR: ultrafast universal RNA-seq aligner. *Bioinformatics* **29**, 15-21  
384 (2013).
- 385 3. Y. Liao, G. K. Smyth, W. Shi, featureCounts: an efficient general purpose program for  
386 assigning sequence reads to genomic features. *Bioinformatics* **30**, 923-930 (2014).
- 387 4. M. I. Love, W. Huber, S. Anders, Moderated estimation of fold change and dispersion for  
388 RNA-seq data with DESeq2. *Genome biology* **15**, 550 (2014).
- 389 5. A. Kramer, J. Green, J. Pollard, Jr., S. Tugendreich, Causal analysis approaches in  
390 Ingenuity Pathway Analysis. *Bioinformatics* **30**, 523-530 (2014).
- 391 6. Y. Hao *et al.*, Integrated analysis of multimodal single-cell data. *Cell* **184**, 3573-3587  
392 e3529 (2021).
- 393 7. K. Jin *et al.*, Implicating Gene and Cell Networks Responsible for Differential COVID-19  
394 Host Responses via an Interactive Single Cell Web Portal. *bioRxiv*,  
395 2021.2006.2007.447287 (2021).
- 396 8. X. Sun *et al.*, A census of the lung: CellCards from LungMAP. *Dev Cell* **57**, 112-145 e112  
397 (2022).
- 398 9. J. Quick, nCoV-2019 sequencing protocol v3 (LoCost) V.3. (2020).
- 399 10. J. R. Tyson *et al.*, Improvements to the ARTIC multiplex PCR method for SARS-CoV-2  
400 genome sequencing using nanopore. *bioRxiv*, 2020.2009.2004.283077 (2020).

401
